# Supplementary material for: A novel dual-structure, self-healable, polysaccharide based hybrid nanogel for biomedical uses
Source: Royal Society of Chemistry journal article supplement (doi:10.1039/c1sm05249g), 2011-01-01
Supplement: c1sm05249g.pdf [file c1sm05249g.pdf]

## Supporting information

### In vivo skin irritation evaluation method and evaluation summary

Table 1 Draize-FHSA Model

|                   |                                                                                               |
|-------------------|-----------------------------------------------------------------------------------------------|
| Number of animals | 6 rabbits (clipped)                                                                           |
| Test sites        | 2 × 1 inch <sup>2</sup> sites on dorsum<br>One site intact, the other abraded                 |
| Test materials    | Applied undiluted to both test sites<br>Liquids: 0.5ml; Solids/semisolids: 0.5g.              |
| Occlusion         | 1 inch <sup>2</sup> surgical gauze over each test sites<br>Rubberized cloth over entire trunk |
| Occlusion period  | 24 hours                                                                                      |
| Assessment        | Visual scoring system after 24, 48, and 72hours                                               |

Table 2 Draize-FHSA Scoring System

| Reaction                                                                      | Score |
|-------------------------------------------------------------------------------|-------|
| Erythema and eschar formation                                                 |       |
| No erythema                                                                   | 0     |
| Very slight erythema (barely perceptible)                                     | 1     |
| Well-defined erythema                                                         | 2     |
| Moderate to severe erythema                                                   | 3     |
| Severe erythema (beet redness) to slight eschar formation (injuries in depth) | 4     |
| Edema formation                                                               |       |
| No edema                                                                      | 0     |
| Very slight edema (barely perceptible)                                        | 1     |
| Slight edema (edges of area well defined by definite raising)                 | 2     |
| Moderate edema (raised approximately 1mm)                                     | 3     |
| Severe edema (raised more than 1mm and extending beyond the area of exposure) | 4     |

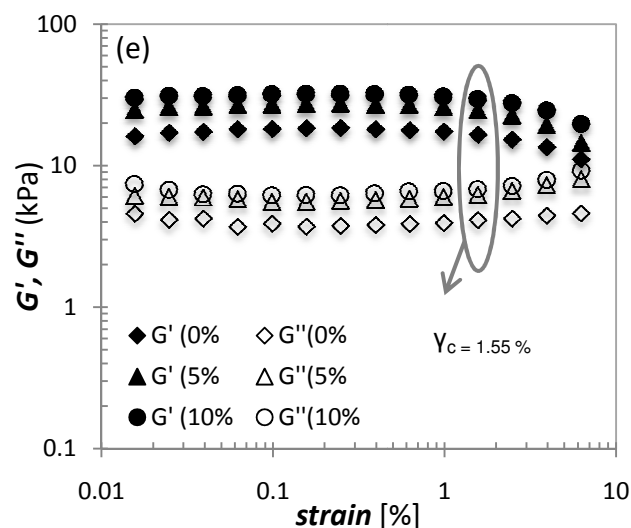

Small deformation tests ( $\gamma = 0.015 \sim 7\%$ ) for sample with CHC/SAL weight ratio = 1/1.5 having varying glycerol content, prepared by exposure to 3 % w/w  $\text{CaCl}_2$ .
